# Supplementary material
Source: PubMed Central journal article supplement (PMC2561160)
Supplement: 97320630002422S1.pdf [file 97320630002422S1.pdf]

### Supplementary material

#### Formulae

$$(P_i)^{SSE} = (n_{i,sse,int}/N_{sse,int}) / (n_{i,sse,total}/N_{sse,total}) \quad \rightarrow \quad (1)$$

where  $n_{i,sse,int}$  and  $N_{sse,int}$  are the counts of residue  $i$  and of all residues belonging to a particular secondary structure type in the interface, respectively;  $n_{i,sse,total}$  and  $N_{sse,total}$  are the corresponding counts in the entire tertiary structure.

#### Tables

| PDB  | Res (Å) <sup>a</sup> | Chain ID (length) <sup>b</sup> |             | Complete assembly <sup>c</sup> |
|------|----------------------|--------------------------------|-------------|--------------------------------|
|      |                      | Amino acids                    | Nucleotides |                                |
| 1a9n | 2.4                  | B(96)                          | Q(24)       | 1+                             |
| 1c0a | 2.4                  | A(585)                         | B(77)       | 1                              |
| 1dfu | 1.8                  | P(94)                          | M(19),N(19) | 1                              |
| 1di2 | 1.9                  | A(69)                          | C(10),D(10) | 2                              |
| 1f7u | 2.2                  | A(607)                         | B(76)       | 1                              |
| 1ffy | 2.2                  | A(917)                         | T(75)       | 1                              |
| 1fxl | 1.8                  | A(167)                         | B(9)        | 1                              |
| 1gtf | 1.8                  | A(74)                          | W(55)       | 22                             |
| 1hc8 | 2.8                  | A(76)                          | C(58)       | 2                              |
| 1hq1 | 1.5                  | A(105)                         | B(49)       | 1                              |
| 1i6u | 2.6                  | A(130)                         | C(37)       | 2                              |
| 1jid | 1.8                  | A(128)                         | B(29)       | 1                              |
| 1k8w | 1.9                  | A(327)                         | B(22)       | 1                              |
| 1knz | 2.5                  | A(164)                         | W(5)        | 8                              |
| 1m8x | 2.2                  | A(349)                         | C(8)        | 2                              |
| 1ooa | 2.5                  | A(326)                         | C(29)       | 2                              |
| 1pgl | 2.8                  | 2(185)                         | 3(6)        | 2 * 60                         |
| 1q2r | 2.9                  | A(386)                         | E(44)       | 4                              |
| 1qf6 | 2.9                  | A(642)                         | B(76)       | 1                              |
| 1r9f | 1.9                  | A(136)                         | B(21),C(21) | 1                              |
| 1sds | 1.8                  | A(117)                         | D(15)       | 3                              |
| 1si2 | 2.6                  | A(149)                         | B(9)        | 1                              |
| 1u0b | 2.3                  | B(461)                         | A(74)       | 1                              |
| 1wpu | 1.5                  | A(147)                         | C(7)        | 2                              |
| 1xok | 3.0                  | D(26)                          | A(30),B(9)  | 2                              |
| 1yvp | 2.2                  | A(538)                         | G(10)       | 2                              |
| 1zbh | 3.0                  | A(299)                         | E(20),F(20) | 4                              |
| 1zbi | 1.9                  | A(142)                         | C(12)       | 2                              |
| 1zh5 | 1.9                  | B(195)                         | C(9)        | 2                              |
| 1zjw | 2.5                  | A(553)                         | B(75)       | 1                              |
| 2anr | 1.9                  | A(178)                         | B(25)       | 1                              |
| 2asb | 1.5                  | A(251)                         | B(11)       | 1                              |
| 2az0 | 2.6                  | A(73)                          | C(18),D(18) | 2                              |
| 2b3j | 2.0                  | A(159)                         | E(16)       | 4                              |
| 2bgg | 2.2                  | A(427)                         | P(8),Q(8)   | 2                              |
| 2bh2 | 2.2                  | A(433)                         | C(37)       | 2                              |
| 2bu1 | 2.2                  | C(129)                         | S(19)       | 3                              |

|      |     |        |             |        |
|------|-----|--------|-------------|--------|
| 2db3 | 2.2 | A(434) | E(10)       | 4      |
| 2dra | 2.5 | A(437) | B(34)       | 1      |
| 2dxi | 2.2 | A(468) | C(75)       | 2      |
| 2f8k | 2.0 | A(88)  | B(16)       | 1      |
| 2fz2 | 2.9 | C(189) | D(3)        | 3 * 60 |
| 2g4b | 2.5 | A(172) | B(7)        | 1      |
| 2gic | 2.9 | D(422) | R(45)       | 5 * 2  |
| 2giw | 2.9 | A(313) | E(19),F(12) | 4      |
| 2gxb | 2.3 | A(66)  | E(7)        | 2      |
| 2hw8 | 2.1 | A(228) | B(36)       | 1      |
| 2ipy | 2.8 | A(888) | C(30)       | 2      |
| 2q66 | 1.8 | A(525) | X(5)        | 1      |
| 2uwm | 2.3 | A(258) | D(23)       | 2      |

**Table 1:** List of protein-RNA complexes. <sup>a</sup>Resolution of the Xray data. <sup>b</sup>Corresponds to the basic unit of the protein involved. <sup>c</sup> Complete assembly indicates how many times the basic unit is repeated to generate the biological unit according to NDB [18]. A '+' sign indicates that the assembly contains additional protein chains.

| Feature                                            | Protein-protein | Protein-DNA | Protein-RNA |
|----------------------------------------------------|-----------------|-------------|-------------|
| Interface area ( $\text{\AA}^2$ ) – total          | 1906±759        | 2039±886    | 2103±1285   |
| – due to protein                                   | 953             | 1014±440    | 1071±677    |
| No. of SSSs                                        | 9.6             | 11.0        | 14.2        |
| No. of SSSs per 1000 $\text{\AA}^2$ interface area | 11.0            | 10.8        | 13.3        |
| No. of helices                                     | 2.1             | 3.4         | 4.3         |
| Helix length                                       | 4.8             | 5.6         | 4.6         |
| No. of strands                                     | 2.8             | 2.6         | 3.6         |
| Strand length                                      | 2.4             | 2.5         | 1.9         |
| No. of NR segments                                 | 4.7             | 5.5         | 6.3         |
| Length of NR segments                              | 3.3             | 3.5         | 3.2         |

**Table 2:** Statistics on secondary structural segments in interfaces. For PP complexes both the components were taken together to get the average values [16]. These have been halved to facilitate comparison with the protein component of PD and PR complexes. Interface area for PP complexes is taken from [5]; the value “due to protein” corresponds to one component only.
